# Supplementary material for: Adsorption of Reactive Blue 116 Dye and Reactive Yellow 81 Dye from Aqueous Solutions by Multi-Walled Carbon Nanotubes
Source: MDPI journal article supplement (doi:10.3390/ma13122757), 2020-06-18
Supplement: s1 [file s1]

# Supplementary Materials: Adsorption of Reactive Blue 116 Dye and Reactive Yellow 81 Dye from Aqueous Solutions by Multi-Walled Carbon Nanotubes

Christian De Benedetto, Anastasia Macario, Carlo Siciliano, János B. Nagy and Pierantonio De Luca \*

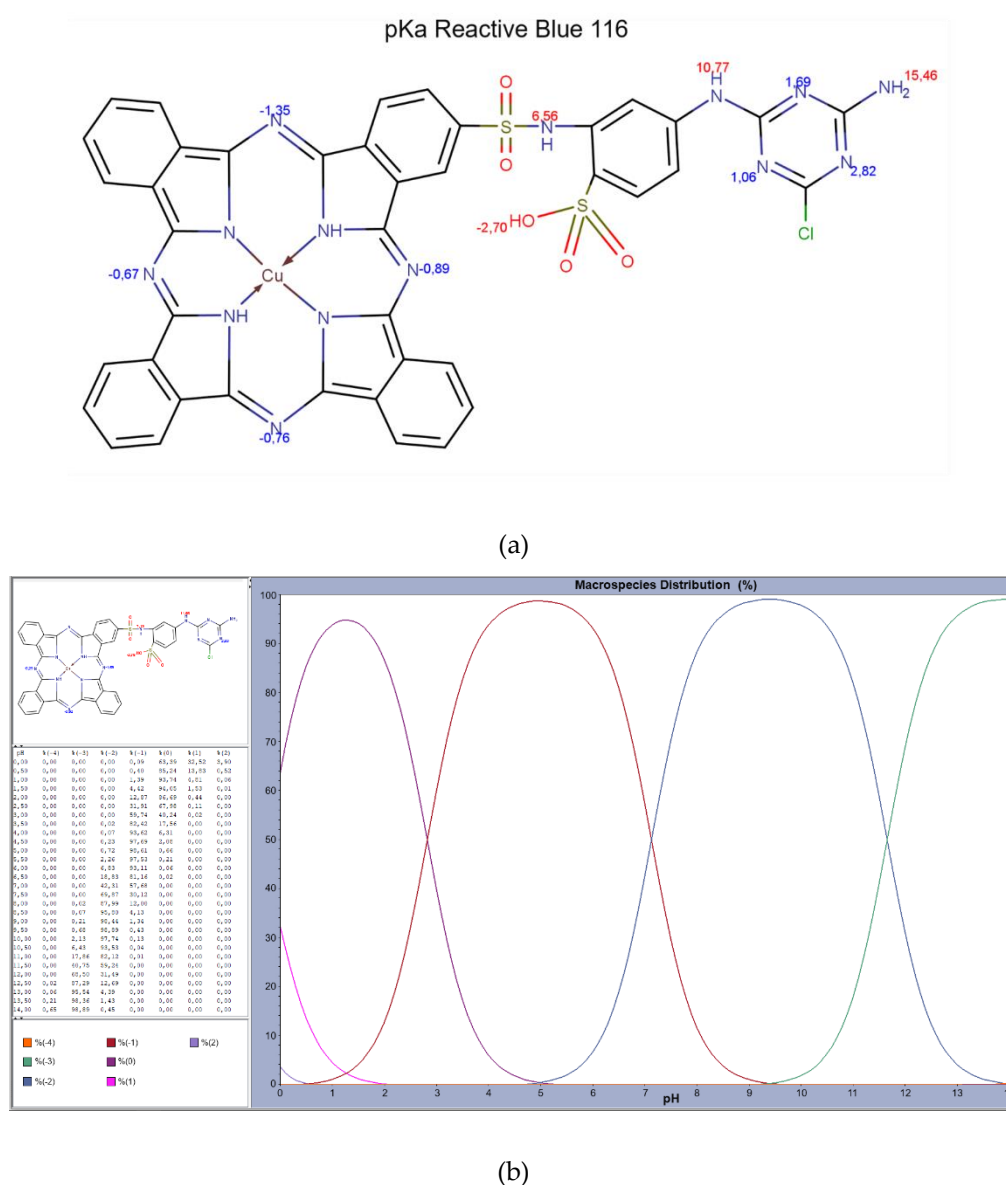

**Figure S1.** (a) RB-116 pKa protonation mechanism; (b) Formation and distribution diagram of the RB-116 complex related on the pH.

## pKa Reactive Yellow 81

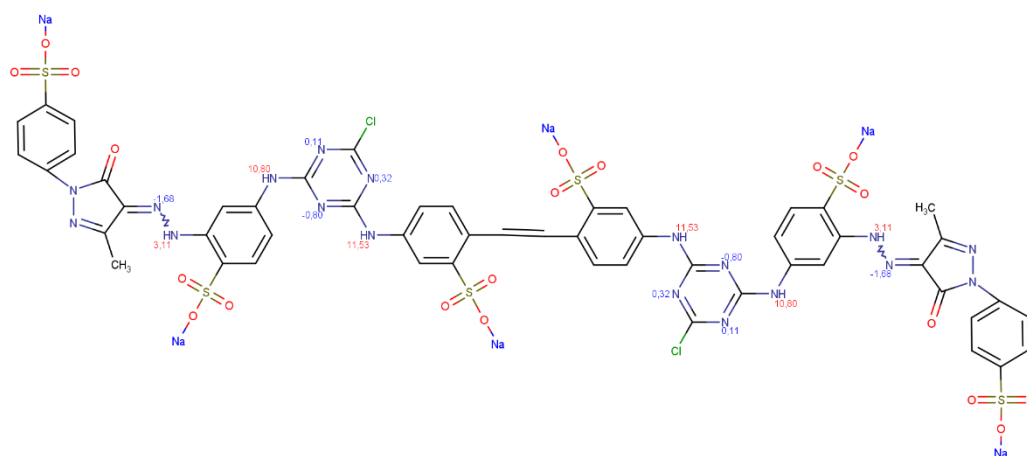

(a)

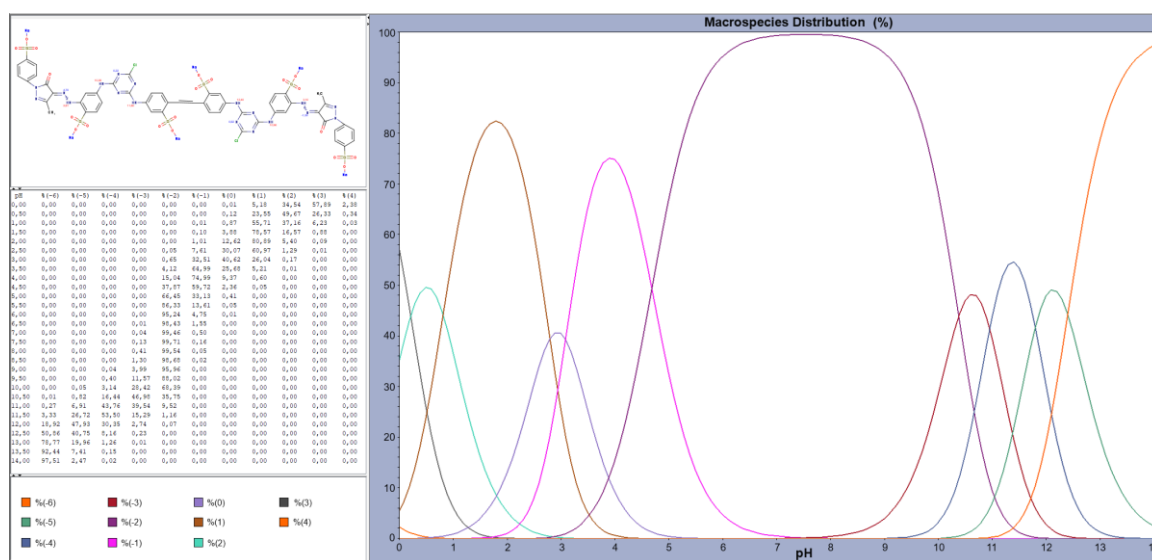

(b)

**Figure S2.** (a) RY-81 pKa protonation mechanism; (b) Formation and distribution diagram of the RY-81 complex related on the pH.

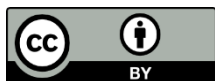

© 2020 by the authors. Licensee MDPI, Basel, Switzerland. This article is an open access article distributed under the terms and conditions of the Creative Commons Attribution (CC BY) license (<http://creativecommons.org/licenses/by/4.0/>).
